# Supplementary material for: BTK inhibitor–induced defects in human neutrophil effector activity against Aspergillus fumigatus are restored by TNF-α
Source: JCI journal article supplement (doi:10.1172/jci.insight.176162), 2024-05-07
Supplement: sd1 [file 1]

You are being redirected.
